# Supplementary material for: Luminescent lanthanide-doped calcium phosphate from oyster shell waste: an example of bright recycling
Source: Royal Society of Chemistry journal article supplement (doi:10.1039/d4ce01217h), 2025-01-01
Supplement: d4ce01217h1.pdf [file d4ce01217h1.pdf]

## Supplementary Information

### Luminescent lanthanide-doped calcium phosphate from oyster shell waste: an example of bright recycling

Paula Puentedura Navarro<sup>a</sup>, Raquel Fernández-Penas<sup>a</sup>, Francisco Javier Acebedo-Martínez<sup>a</sup>, Carla Triunfo<sup>b</sup>, Jorge F. Fernández-Sánchez<sup>c</sup>, Antonia Follenzi<sup>d</sup>, Francesca Oltolina<sup>d\*</sup>, Giuseppe Falini<sup>b</sup>, Jaime Gómez-Morales<sup>a\*</sup>

<sup>a</sup>*Laboratorio de Estudios Cristalográficos, IACT (CSIC), Avda. Las Palmeras, nº 4, 18100 Armilla (Spain).*

<sup>b</sup>*Department of Chemistry “Giacomo Ciamician”, University of Bologna, via F. Selmi 2, 40126 Bologna (Italy).*

<sup>c</sup>*Department of Analytical Chemistry, Faculty of Sciences, University of Granada, Avda. Fuentenueva s/n, 18071 Granada, Spain.*

<sup>d</sup>*Dipartimento di Scienze della Salute, Università del Piemonte Orientale, “A. Avogadro” Via Solaroli 17, 28100 Novara (Italy).*

\*Corresponding authors: [jaime@lec.csic.es](mailto:jaime@lec.csic.es) (*J. G.-M.*), [francesca.oltolina@med.uniupo.it](mailto:francesca.oltolina@med.uniupo.it) (*F.O.*)

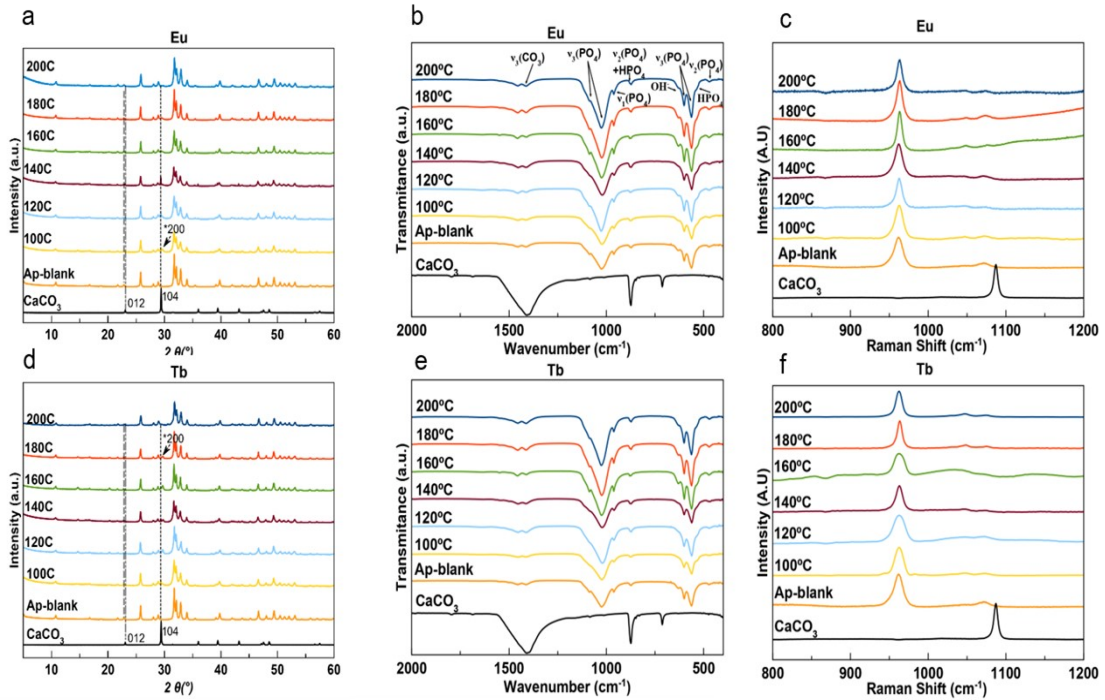

Figure S1. Conversion of bCC powder to Eu- and Tb-doped apatites at temperatures between 100 °C and 200 °C for 7 days analyzed by XRD (a, d), FTIR (b, e) and Raman spectroscopy (c, f).

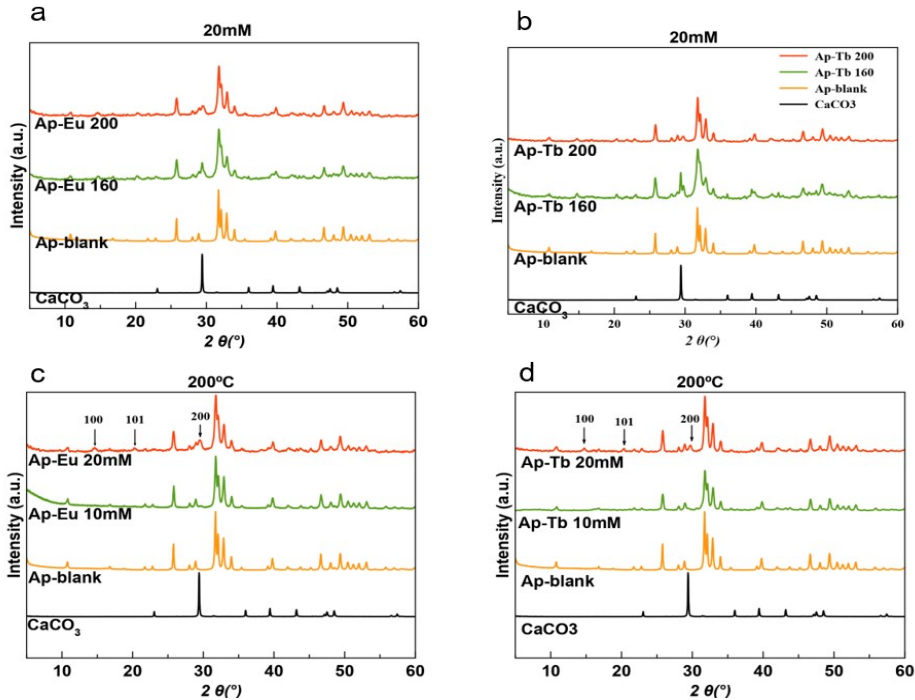

Figure S2. XRD patterns corresponding to the conversion of bCC powder to Eu- and Tb-doped apatites at 160°C and 200 °C for 7 days in presence of 20mM  $\text{Eu}^{3+}$ (a) and 20 mM  $\text{Tb}^{3+}$ (b), and at 200 °C in presence of 10 and 20 mM  $\text{Eu}^{3+}$  (c), and 10 and 20 mM  $\text{Tb}^{3+}$ .

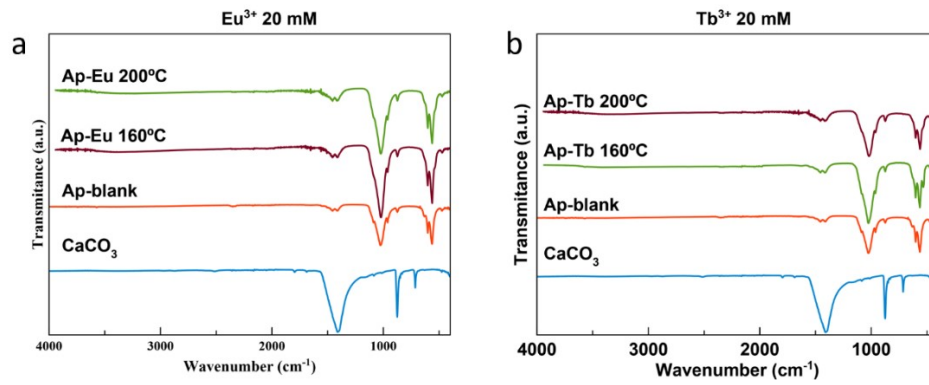

Figure S3. FTIR spectra corresponding to the conversion of bCC powder to Eu- and Tb-doped apatites at 160°C and 200 °C for 7 days in presence of 20mM  $\text{Eu}^{3+}$ (a) and 20 mM  $\text{Tb}^{3+}$ (b).

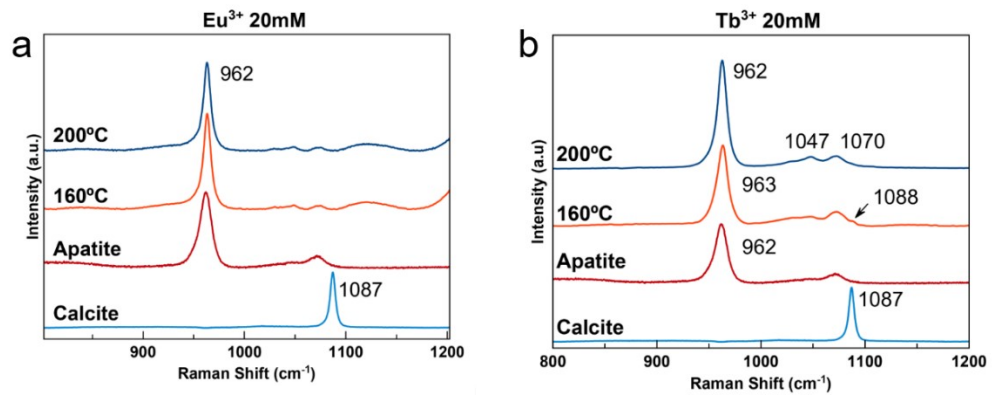

Figure S4. Raman spectra corresponding to the conversion of bCC powder to Eu- and Tb-doped apatites at 160°C and 200 °C for 7 days in presence of 20mM  $\text{Eu}^{3+}$ (a) and 20 mM  $\text{Tb}^{3+}$ (b).

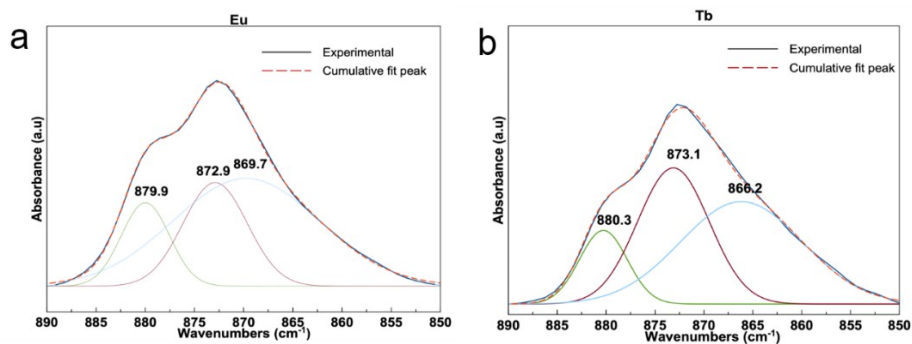

Figure S5. Deconvolution of the FTIR 875  $\text{cm}^{-1}$  band of samples prepared in presence of 10 mM  $\text{Eu}^{3+}$  (a) and 10 mM  $\text{Tb}^{3+}$  (b) into three sub-bands attributed from left to right to A-type ( $\text{CO}_3^{2-}$  replacing  $\text{OH}^-$ ), B-type ( $\text{CO}_3^{2-}$  replacing  $\text{PO}_4^{3-}$ ) and labile  $\text{CO}_3^{2-}$  species located at the surface of the particles.

Table S1. Element composition determined by ICP

| Sample<br>(T °C, Conc<br>Ln mM) | Eu<br>(ppm) | Tb<br>(ppm) | Ca<br>(ppm) | P<br>(ppm) | (Ln+Ca)<br>/P |
|---------------------------------|-------------|-------------|-------------|------------|---------------|
| Ap-Eu (160,10)                  | 21,57       |             | 289,30      | 132,50     | 1.72          |
| Ap-Eu (200,10)                  | 26,74       |             | 291,00      | 127,40     | 1.81          |
| Ap-Eu (160,20)                  | 48,33       |             | 273,30      | 117,40     | 1.88          |
| Ap-Tb (160,10)                  |             | 35,32       | 274,90      | 130,30     | 1.68          |
| Ap-Tb (200,10)                  |             | 20,07       | 293,20      | 132,70     | 1.74          |
| Ap-Tb (160,20)                  |             | 34,04       | 257,00      | 103,20     | 1.99          |
| Ap (160,0) (Blank)              |             |             | 297,80      | 114,70     | 2.00          |
| Ap (200,0) (Blank)              |             |             | 297,20      | 127,10     | 1.80          |

Eu and Tb determined by ICP-MS and Ca and P by ICP-OES

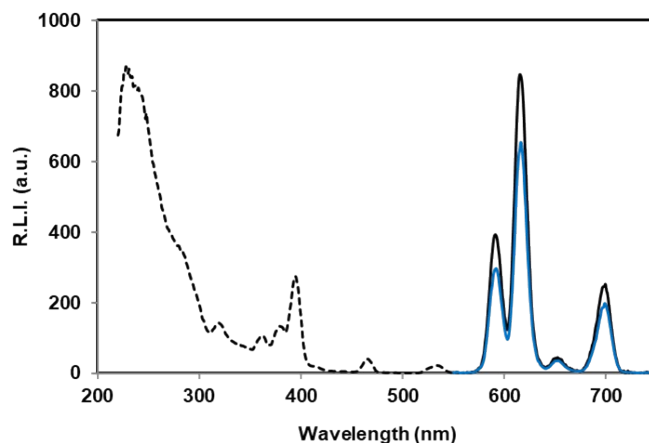

Figure S6. Uncorrected excitation (dashed lines) and emission (solid lines) spectra of Eu-doped particle prepared with 20 mM Eu and at 200°C using a  $\lambda_{\text{exc}}=230$  nm (black line) and  $\lambda_{\text{exc}}=395$  nm (blue line). Slit-widths<sub>exc/em</sub> = 10/10 nm,  $t_d = 120$   $\mu$ s,  $t_g = 5$  ms and voltage detector = 480v.

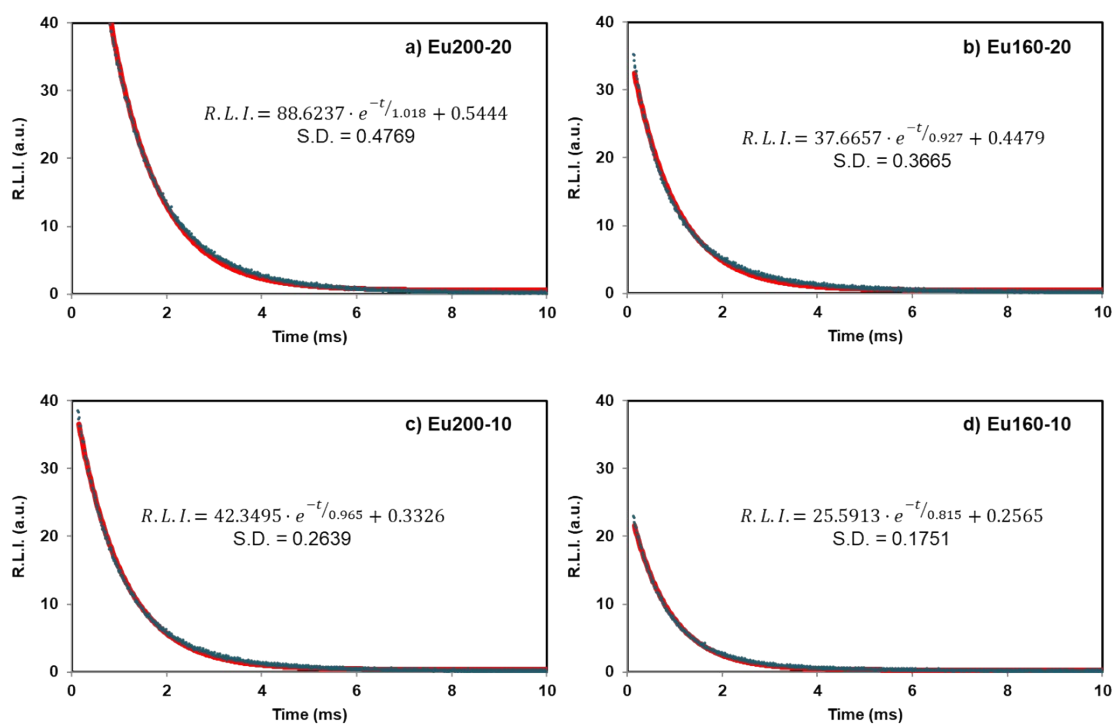

Figure S7. Luminescence decay curve of Eu-doped particles.  $\lambda_{\text{exc/em}} = 395/616$  nm, slit-widths<sub>exc/em</sub> = 10/10 nm, and detector voltage = 700 V. Circles correspond to experimental data and lines to the fitting equation.

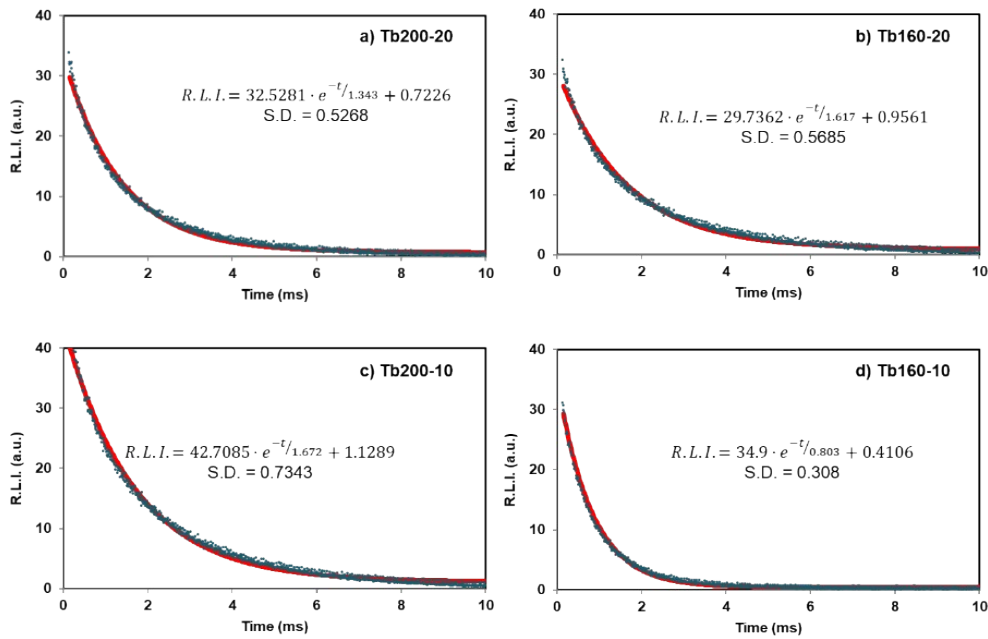

Figure S8. Luminescence decay curve of Tb-doped particles.  $\lambda_{exc/em} = 372/543$  nm, slit-widths<sub>exc/em</sub> = 20/20 nm, and detector voltage = 800 V. Circles correspond to experimental data and lines to the fitting equation.

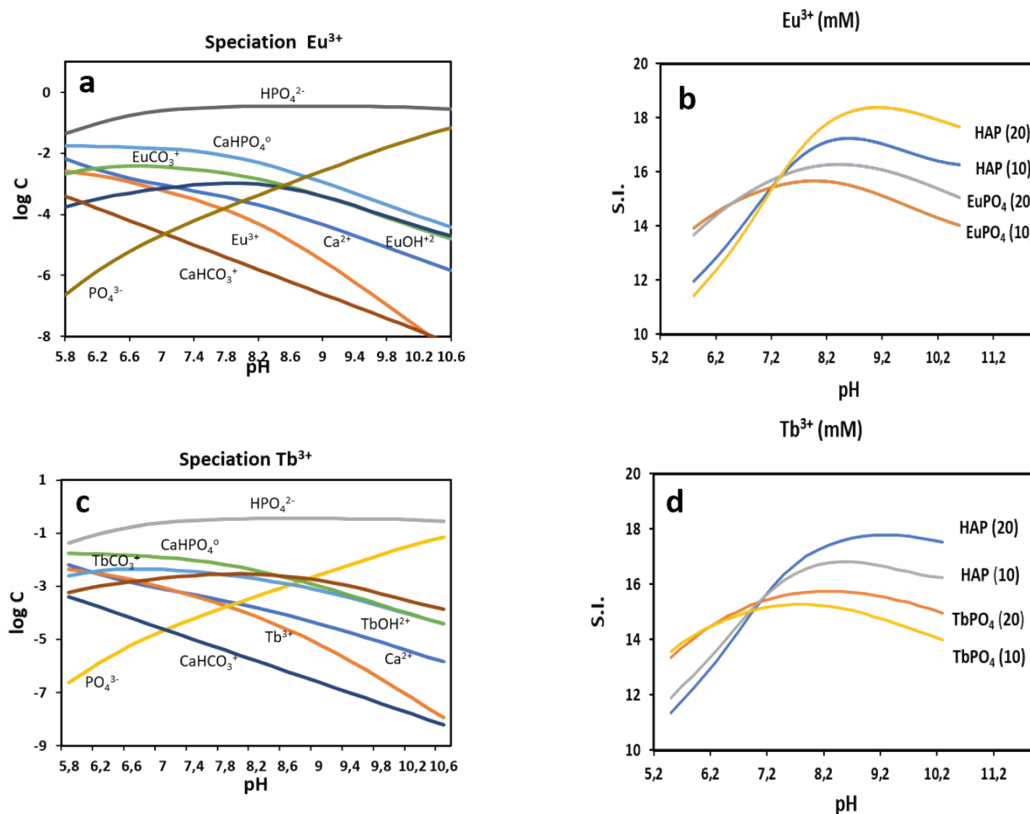

Figure S9. Speciation (a,c) in the system calcite/(H<sub>2</sub>PO<sub>4</sub><sup>-</sup>/HPO<sub>4</sub><sup>2-</sup>/PO<sub>4</sub><sup>3-</sup>)/Ln<sup>3+</sup> as a function of pH using 10 mM Ln<sup>3+</sup> and saturation index (S.I.) (b, d) using 10 and 20 mM Ln<sup>3+</sup>.
